# Supplementary material for: Visible-light driven hydrogen production using chlorophyll derivatives conjugated with a viologen moiety in the presence of platinum nanoparticles
Source: Royal Society of Chemistry journal article supplement (doi:10.1039/c9pp00176j), 2019-08-20
Supplement: c9pp00176j1.pdf [file c9pp00176j1.pdf]

### Supporting information

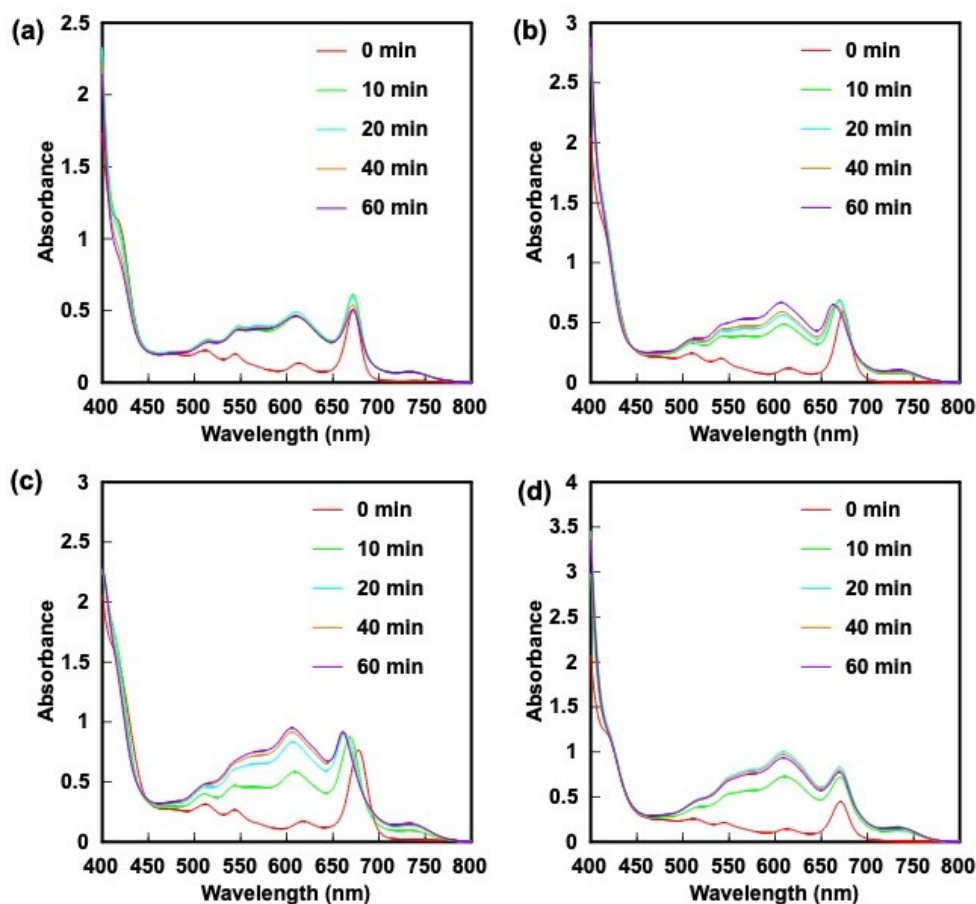

**Fig. S1.** Time dependence of UV-vis absorption spectra changes in the solution consisting of NADH (10 mM), Chl derivative (10  $\mu$ M: methyl Pyro-*a* (a), **1** (b), **2** (c), and **3** (d)), MV (10 mM), and CTAB (10 mM) in 10 mM phosphate buffer (pH 6.9) with visible-light irradiation.

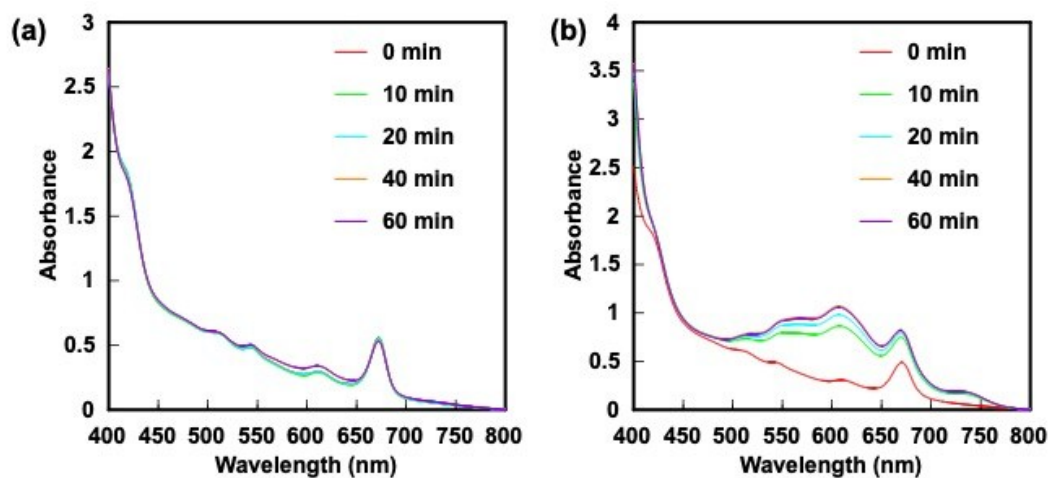

**Fig. S2.** Time dependence of UV-vis absorption spectra changes in the solution consisting of NADH (10 mM), Chl derivative (10  $\mu$ M: methyl Pyro-*a* (a), **1** (b), **2** (c), and **3** (d)), MV (10 mM), PtPVP (0.08 mg·mL<sup>-1</sup>), and CTAB (10 mM) in 10 mM phosphate buffer (pH 6.9) with visible-light irradiation.
